# Supplementary material for: "Missing" G x E Variation Controls Flowering Time in Arabidopsis thaliana
Source: PubMed Central journal article supplement (PMC4608753; doi:10.1371/journal.pgen.1005597), 2015-10-16

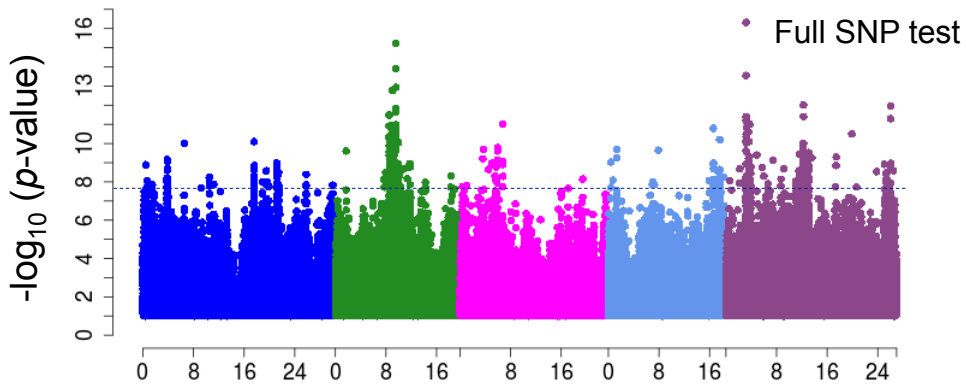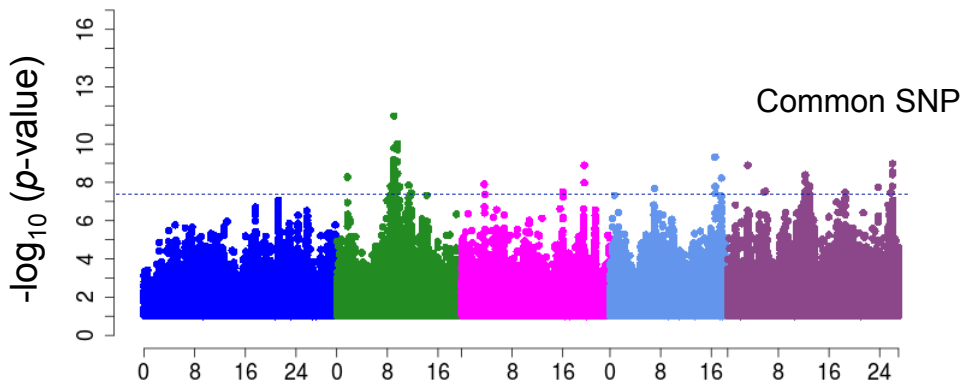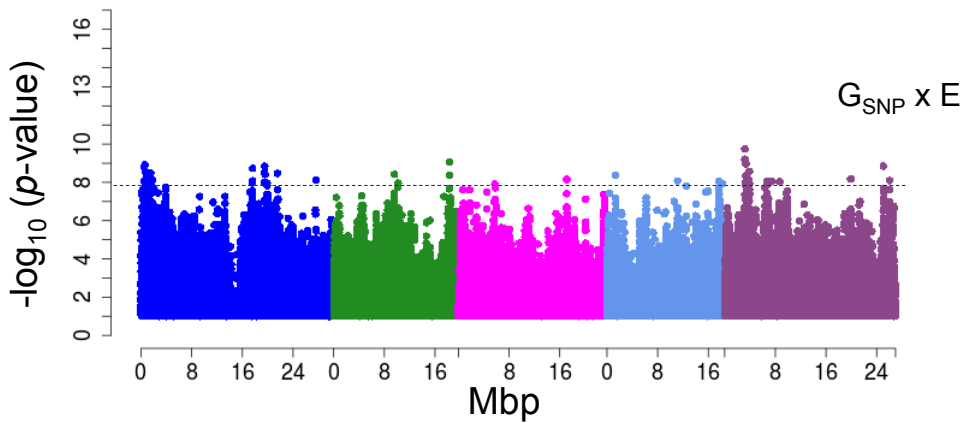

Supplement: pgen.1005597.s004.pdf [file pgen.1005597.s004.pdf]
