# Supplementary material for: "Missing" G x E Variation Controls Flowering Time in Arabidopsis thaliana
Source: PubMed Central journal article supplement (PMC4608753; doi:10.1371/journal.pgen.1005597), 2015-10-16
Supplement: pgen.1005597.s011.pdf [file pgen.1005597.s011.pdf]

**Table S4. All associations significant at the  $10^{-5}$  level.**

| Chr           | Position | MAF  | <i>p</i> -value | Gene ID   | Distance (bp) | Description                                              |
|---------------|----------|------|-----------------|-----------|---------------|----------------------------------------------------------|
| Full SNP test |          |      |                 |           |               |                                                          |
| 5             | 3180721  | 39.1 | 2.72E-09        | AT5G10140 | 1273          | FLC;MADS-box transcription factor family protein         |
|               |          |      |                 | AT5G10150 | 1262          | Domain of unknown function (DUF966)                      |
| 2             | 9005735  | 39.7 | 2.33E-08        | AT2G20950 | 0             | Arabidopsis phospholipase-like protein (PEARLI 4) family |
| 2             | 9038659  | 36.8 | 5.83E-08        | AT2G21060 | 1009          | ATCSP4;glycine-rich protein 2B                           |
|               |          |      |                 | AT2G21070 | 2193          | FIO1;methyltransferases                                  |
| 2             | 9002939  | 39.7 | 8.18E-08        | AT2G20940 | 238           | Protein of unknown function (DUF1279)                    |
|               |          |      |                 | AT2G20950 | 196           | Arabidopsis phospholipase-like protein (PEARLI 4) family |
| 2             | 9034914  | 25.9 | 1.06E-07        | AT2G21050 | 0             | LAX2;like AUXIN RESISTANT 2                              |
| 2             | 9041551  | 39.1 | 1.96E-07        | AT2G21070 | 0             | FIO1;methyltransferases                                  |
| 2             | 9046018  | 39.1 | 1.96E-07        | AT2G21090 | 0             | Pentatricopeptide repeat (PPR-like) superfamily protein  |
| 2             | 9049645  | 39.1 | 1.96E-07        | AT2G21100 | 241           | Disease resistance-responsive family protein             |
|               |          |      |                 | AT2G21110 | 645           | Disease resistance-responsive family protein             |
| 2             | 9052359  | 39.1 | 1.96E-07        | AT2G21120 | 0             | Protein of unknown function (DUF803)                     |
| 2             | 9044852  | 38.5 | 2.59E-07        | AT2G21080 | 0             | protein coding                                           |
| 2             | 9047636  | 38.5 | 2.59E-07        | AT2G21090 | 57            | Pentatricopeptide repeat (PPR-like) superfamily protein  |
|               |          |      |                 | AT2G21100 | 495           | Disease resistance-responsive family protein             |
| 2             | 9049040  | 38.5 | 2.59E-07        | AT2G21100 | 0             | Disease resistance-responsive family protein             |
| 2             | 9050568  | 38.5 | 2.59E-07        | AT2G21110 | 0             | Disease resistance-responsive family protein             |
| 2             | 9050927  | 38.5 | 2.59E-07        | AT2G21110 | 77            | Disease resistance-responsive family protein             |
|               |          |      |                 | AT2G21120 | 821           | Protein of unknown function (DUF803)                     |
| 2             | 9001385  | 33.3 | 3.82E-07        | AT2G20930 | 0             | SNARE-like superfamily protein                           |
| 2             | 9001740  | 33.3 | 3.82E-07        | AT2G20930 | 3             | SNARE-like superfamily protein                           |
|               |          |      |                 | AT2G20940 | 292           | Protein of unknown function (DUF1279)                    |
| 5             | 3184162  | 29.3 | 5.54E-07        | AT5G10150 | 297           | Domain of unknown function (DUF966)                      |
|               |          |      |                 | AT5G10160 | 1584          | Thioesterase superfamily protein                         |
| 5             | 17742294 | 21.8 | 9.13E-07        | AT5G44080 | 2421          | bZIP transcription factor family protein                 |
|               |          |      |                 | AT5G44090 | 472           | Calcium-binding EF-hand family protein                   |
| 2             | 8989557  | 32.8 | 9.81E-07        | AT2G20900 | 0             | ATDGK5,DGK5;diacylglycerol kinase 5                      |
| 5             | 3358289  | 32.8 | 1.10E-06        | AT5G10620 | 1674          | methyltransferases                                       |
|               |          |      |                 | AT5G10625 | 498           | protein coding                                           |
| 2             | 9070665  | 36.2 | 2.68E-06        | AT2G21160 | 234           | Translocon-associated protein, alpha subunit             |
|               |          |      |                 | AT2G21170 | 89            | PDTPI;triosephosphate isomerase                          |
| 2             | 9593397  | 25.9 | 2.96E-06        | AT2G22590 | 0             | protein coding                                           |
| 2             | 9596991  | 25.9 | 2.96E-06        | AT2G22600 | 0             | RNA-binding KH domain-containing protein                 |
| 2             | 8778734  | 35.1 | 4.66E-06        | AT2G20330 | 3120          | Transducin/WD40 repeat-like superfamily protein          |
|               |          |      |                 | AT2G20340 | 1001          | PLP-dependent transferases superfamily protein           |
| 2             | 9151447  | 33.9 | 5.28E-06        | AT2G21385 | 0             | protein coding                                           |
| 2             | 9037421  | 24.7 | 5.30E-06        | AT2G21060 | 0             | ATCSP4;glycine-rich protein 2B                           |
| 5             | 3748839  | 42.5 | 5.40E-06        | AT5G11650 | 1714          | alpha/beta-Hydrolases superfamily protein                |
|               |          |      |                 | AT5G11660 | 41            | Protein of Unknown Function (DUF239)                     |
| 2             | 9091028  | 38.5 | 5.61E-06        | AT2G21220 | 1215          | SAUR-like auxin-responsive protein family                |
|               |          |      |                 | AT2G21230 | 2596          | bZIP transcription factor family protein                 |
| 5             | 3359368  | 35.1 | 6.62E-06        | AT5G10625 | 0             | protein coding                                           |
| 2             | 9036673  | 23.6 | 7.50E-06        | AT2G21050 | 37            | LAX2;like AUXIN RESISTANT 2                              |
|               |          |      |                 | AT2G21060 | 120           | ATCSP4;glycine-rich protein 2B                           |
| 2             | 8640484  | 28.2 | 7.79E-06        | AT2G20010 | 0             | Protein of unknown function (DUF810)                     |
| 5             | 19897840 | 32.2 | 8.06E-06        | AT5G49100 | 0             | protein coding                                           |
| 2             | 9589040  | 24.7 | 8.11E-06        | AT2G22560 | 202           | Kinase interacting (KIP1like) family protein             |

Continued

| Chr                | Position | MAF  | <i>p</i> -value | Gene ID   | Distance (bp) | Description                                              |
|--------------------|----------|------|-----------------|-----------|---------------|----------------------------------------------------------|
|                    |          |      |                 | AT2G22570 | 395           | ATNIC1;nicotinamidase 1                                  |
| 2                  | 9590291  | 24.7 | 8.11E-06        | AT2G22570 | 0             | ATNIC1;nicotinamidase 1                                  |
| 5                  | 23249568 | 10.9 | 8.48E-06        | AT5G57380 | 64            | VIN3;Fibronectin type III domain-containing protein      |
|                    |          |      |                 | AT5G57390 | 3891          | AIL5;AINTEGUMENTA-like 5                                 |
| 2                  | 9145587  | 44.8 | 8.81E-06        | AT2G21380 | 0             | Kinesin motor family protein                             |
| Common SNP effects |          |      |                 |           |               |                                                          |
| 2                  | 9005735  | 39.7 | 3.68E-09        | AT2G20950 | 0             | Arabidopsis phospholipase-like protein (PEARLI 4) family |
| 2                  | 9038659  | 36.8 | 1.01E-08        | AT2G21060 | 1009          | ATCSP4,ATGRP2B,GRP2B;glycine-rich protein 2B             |
|                    |          |      |                 | AT2G21070 | 2193          | FIO1;methyltransferases                                  |
| 2                  | 9002939  | 39.7 | 1.23E-08        | AT2G20940 | 238           | Protein of unknown function (DUF1279)                    |
|                    |          |      |                 | AT2G20950 | 196           | Arabidopsis phospholipase-like protein (PEARLI 4) family |
| 2                  | 9034914  | 25.9 | 2.84E-08        | AT2G21050 | 0             | LAX2;like AUXIN RESISTANT 2                              |
| 2                  | 9041551  | 39.1 | 3.47E-08        | AT2G21070 | 0             | FIO1;methyltransferases                                  |
| 2                  | 9046018  | 39.1 | 3.47E-08        | AT2G21090 | 0             | Pentatricopeptide repeat (PPR-like) superfamily protein  |
| 2                  | 9049645  | 39.1 | 3.47E-08        | AT2G21100 | 241           | Disease resistance-responsive family protein             |
|                    |          |      |                 | AT2G21110 | 645           | Disease resistance-responsive family protein             |
| 2                  | 9052359  | 39.1 | 3.47E-08        | AT2G21120 | 0             | Protein of unknown function (DUF803)                     |
| 2                  | 9044852  | 38.5 | 3.97E-08        | AT2G21080 | 0             | protein coding                                           |
| 2                  | 9047636  | 38.5 | 3.97E-08        | AT2G21090 | 57            | Pentatricopeptide repeat (PPR-like) superfamily          |
|                    |          |      |                 | AT2G21100 | 495           | Disease resistance-responsive family protein             |
| 2                  | 9049040  | 38.5 | 3.97E-08        | AT2G21100 | 0             | Disease resistance-responsive family protein             |
| 2                  | 9050568  | 38.5 | 3.97E-08        | AT2G21110 | 0             | Disease resistance-responsive family protein             |
| 2                  | 9050927  | 38.5 | 3.97E-08        | AT2G21110 | 77            | Disease resistance-responsive family protein             |
|                    |          |      |                 | AT2G21120 | 821           | Protein of unknown function (DUF803)                     |
| 2                  | 9001385  | 33.3 | 6.13E-08        | AT2G20930 | 0             | SNARE-like superfamily protein                           |
| 2                  | 9001740  | 33.3 | 6.13E-08        | AT2G20930 | 3             | SNARE-like superfamily protein                           |
|                    |          |      |                 | AT2G20940 | 292           | Protein of unknown function (DUF1279)                    |
| 5                  | 17742294 | 21.8 | 1.38E-07        | AT5G44080 | 2421          | bZIP transcription factor family protein                 |
|                    |          |      |                 | AT5G44090 | 472           | Calcium-binding EF-hand family protein                   |
| 2                  | 8989557  | 32.8 | 1.67E-07        | AT2G20900 | 0             | ATDGK5;diacylglycerol kinase 5                           |
| 5                  | 3180721  | 39.1 | 3.58E-07        | AT5G10140 | 1273          | FLC; MADS-box transcription factor family protein        |
|                    |          |      |                 | AT5G10150 | 1262          | Domain of unknown function (DUF966)                      |
| 2                  | 9070665  | 36.2 | 4.12E-07        | AT2G21160 | 234           | Translocon-associated protein (TRAP), alpha subunit      |
|                    |          |      |                 | AT2G21170 | 89            | PDTPI;triosephosphate isomerase                          |
| 2                  | 8778734  | 35.1 | 7.47E-07        | AT2G20330 | 3120          | Transducin/WD40 repeat-like superfamily protein          |
|                    |          |      |                 | AT2G20340 | 1001          | PLP-dependent transferases superfamily protein           |
| 2                  | 9091028  | 38.5 | 9.27E-07        | AT2G21220 | 1215          | SAUR-like auxin-responsive protein family                |
|                    |          |      |                 | AT2G21230 | 2596          | bZIP transcription factor family protein                 |
| 5                  | 23249568 | 10.9 | 1.47E-06        | AT5G57380 | 64            | VIN3;Fibronectin type III domain-containing protein      |
|                    |          |      |                 | AT5G57390 | 3891          | AIL5;AINTEGUMENTA-like 5                                 |
| 2                  | 9149839  | 45.4 | 1.84E-06        | AT2G21385 | 0             | protein coding                                           |
| 2                  | 9145587  | 44.8 | 2.08E-06        | AT2G21380 | 0             | Kinesin motor family protein                             |
| 2                  | 9014510  | 50   | 2.18E-06        | AT2G20980 | 579           | MCM10;minichromosome maintenance 10                      |
|                    |          |      |                 | AT2G20990 | 42            | ATSYTA;synaptotagmin A                                   |
| 2                  | 9002083  | 39.1 | 2.19E-06        | AT2G20940 | 0             | Protein of unknown function (DUF1279)                    |
| 5                  | 23543157 | 12.1 | 2.26E-06        | AT5G58170 | 0             | GDPDL7;SHV3-like 5                                       |
| 2                  | 9154645  | 73.6 | 2.28E-06        | AT2G21390 | 0             | Coatomer, alpha subunit                                  |
| 2                  | 9156966  | 73.6 | 2.28E-06        | AT2G21390 | 88            | Coatomer, alpha subunit                                  |
|                    |          |      |                 | AT2G21400 | 1424          | SRS3;SHI-related sequence3                               |

Continued

| Chr | Position | MAF  | <i>p</i> -value | Gene ID   | Distance (bp) | Description                                                  |
|-----|----------|------|-----------------|-----------|---------------|--------------------------------------------------------------|
| 2   | 9017941  | 28.7 | 2.38E-06        | AT2G20990 | 0             | ATSYTA;synaptotagmin A                                       |
| 2   | 9027894  | 28.7 | 2.38E-06        | AT2G21045 | 0             | Rhodanese/Cell cycle control phosphatase superfamily protein |
| 2   | 9037421  | 75.3 | 2.40E-06        | AT2G21060 | 0             | ATCSP4;glycine-rich protein 2B                               |
| 5   | 23534278 | 10.3 | 2.56E-06        | AT5G58160 | 0             | actin binding                                                |
| 2   | 9029072  | 33.9 | 2.56E-06        | AT2G21045 | 52            | Rhodanese/Cell cycle control phosphatase superfamily protein |
|     |          |      |                 | AT2G21050 | 5018          | LAX2;like AUXIN RESISTANT 2                                  |
| 2   | 9036673  | 23.6 | 2.63E-06        | AT2G21050 | 37            | LAX2;like AUXIN RESISTANT 2                                  |
|     |          |      |                 | AT2G21060 | 120           | ATCSP4,ATGRP2B,GRP2B;glycine-rich protein 2B                 |
| 5   | 23544472 | 11.5 | 2.84E-06        | AT5G58180 | 0             | ATYKT62;Synaptobrevin family protein                         |
| 5   | 23545876 | 11.5 | 2.84E-06        | AT5G58180 | 116           | ATYKT62;Synaptobrevin family protein                         |
|     |          |      |                 | AT5G58190 | 453           | ECT10;evolutionarily conserved C-terminal region 10          |
| 5   | 23547556 | 11.5 | 2.84E-06        | AT5G58190 | 0             | ECT10;evolutionarily conserved C-terminal region 10          |
| 5   | 23550180 | 11.5 | 2.84E-06        | AT5G58200 | 0             | Calcineurin-like metallo-phosphoesterase superfamily protein |
| 5   | 23560954 | 11.5 | 2.84E-06        | AT5G58260 | 0             | NdhN;oxidoreductases                                         |
| 5   | 23530884 | 9.8  | 3.05E-06        | AT5G58140 | 0             | NPL1;phototropin 2                                           |
| 2   | 9060886  | 35.6 | 3.81E-06        | AT2G21140 | 0             | ATPRP2;proline-rich protein 2                                |
| 4   | 7065838  | 90.8 | 4.47E-06        | AT4G11720 | 0             | GCS1;hapless 2                                               |
| 4   | 17599693 | 28.7 | 4.60E-06        | AT4G37432 | 1003          | other RNA                                                    |
|     |          |      |                 | AT4G37440 | 1529          | protein coding                                               |
| 2   | 8795687  | 21.3 | 4.65E-06        | AT2G20380 | 0             | Galactose oxidase/kelch repeat superfamily protein           |
| 2   | 8796100  | 21.3 | 4.65E-06        | AT2G20380 | 120           | Galactose oxidase/kelch repeat superfamily protein           |
|     |          |      |                 | AT2G20390 | 183           | protein coding                                               |
| 2   | 9088650  | 22.4 | 5.16E-06        | AT2G21210 | 2741          | SAUR-like auxin-responsive protein family                    |
|     |          |      |                 | AT2G21220 | 676           | SAUR-like auxin-responsive protein family                    |
| 2   | 9149629  | 48.3 | 5.85E-06        | AT2G21380 | 320           | Kinesin motor family protein                                 |
|     |          |      |                 | AT2G21385 | 10            | protein coding                                               |
| 5   | 23177309 | 20.1 | 6.34E-06        | AT5G57190 | 1945          | PSD2;phosphatidylserine decarboxylase 2                      |
|     |          |      |                 | AT5G57200 | 387           | ENTH/ANTH/VHS superfamily protein                            |
| 5   | 23140522 | 12.6 | 6.39E-06        | AT5G57126 | 1116          | transposable element gene                                    |
|     |          |      |                 | AT5G57130 | 4458          | Clp amino terminal domain-containing protein                 |
| 3   | 5255916  | 73.6 | 6.48E-06        | AT3G15530 | 1354          | SAM MTases superfamily protein                               |
|     |          |      |                 | AT3G15534 | 2960          | protein coding                                               |
| 2   | 8892926  | 58   | 6.96E-06        | AT2G20620 | 318           | Protein of unknown function (DUF626)                         |
| 2   | 9596991  | 74.1 | 7.36E-06        | AT2G22600 | 374           | RNA-binding KH domain-containing protein                     |
| 5   | 23587485 | 9.8  | 7.63E-06        | AT5G58350 | 0             | WNK4;with no lysine (K) kinase 4                             |
| 5   | 23592035 | 9.8  | 7.63E-06        | AT5G58360 | 1066          | ATOFP3;ovate family protein 3                                |
|     |          |      |                 | AT5G58370 | 1082          | Ploop_NTPase                                                 |
| 2   | 8785331  | 21.8 | 8.28E-06        | AT2G20350 | 0             | Integrase-type DNA-binding superfamily protein               |
| 3   | 19403042 | 24.7 | 8.42E-06        | AT3G52320 | 0             | F-box and associated interaction domains-containing protein  |
| 5   | 23111982 | 24.7 | 8.56E-06        | AT5G57110 | 0             | ACA8;autoinhibited Ca <sup>2+</sup> -ATPase, isoform 8       |
| 2   | 11276755 | 24.7 | 8.89E-06        | AT2G26510 | 0             | PDE135;Xanthine/uracil permease family protein               |
| 2   | 9589040  | 24.7 | 8.92E-06        | AT2G22560 | 202           | Kinase interacting (KIP1-like) family protein                |
|     |          |      |                 | AT2G22570 | 395           | ATNIC1;nicotinamidase 1                                      |
| 2   | 9590291  | 24.7 | 8.92E-06        | AT2G22570 | 0             | ATNIC1;nicotinamidase 1                                      |

G<sub>SNP</sub> x E effects  
NA
